# Supplementary material
Source: PubMed Central journal article supplement (PMC3033607)
Supplement: supp_75.19.1678_figures_e-1_e-2_e-3.pdf [file supp_75.19.1678_figures_e-1_e-2_e-3.pdf]

Supplementary figures for one-way deterministic sensitivity analyses over the lifetime of the cohort.

Figure e-1. Probabilities of mRS 0 to 2 after mechanical thrombectomy (A) or after IV tPA (B). The ICER is  $[(\$_{\text{Multi-modal CT}} - \$_{\text{NCCT}}) / (\text{QALY}_{\text{Multi-modal CT}} - \text{QALY}_{\text{NCCT}})]$ . A) For probabilities <61%, multi-modal CT has reduced costs with greater QALYs compared to NCCT. For probabilities  $\geq 61\%$ , multi-modal CT has reduced costs and fewer QALYs than NCCT. B) For probabilities >38%, multi-modal CT has reduced costs with greater QALYs compared to NCCT. For probabilities  $\leq 38\%$ , multi-modal CT has reduced costs and fewer QALYs than NCCT.

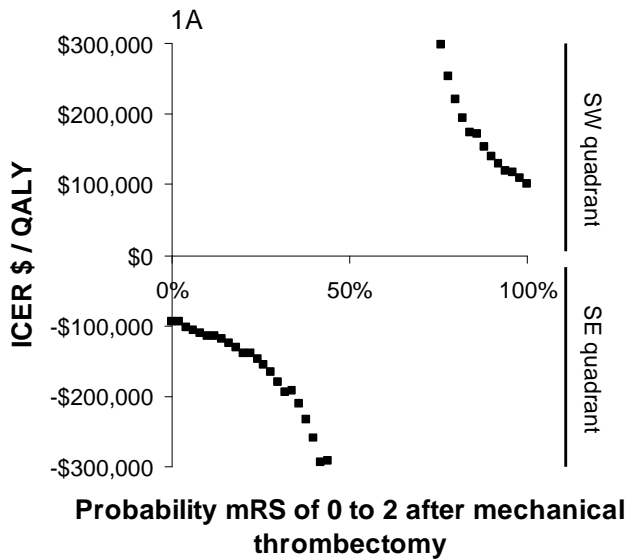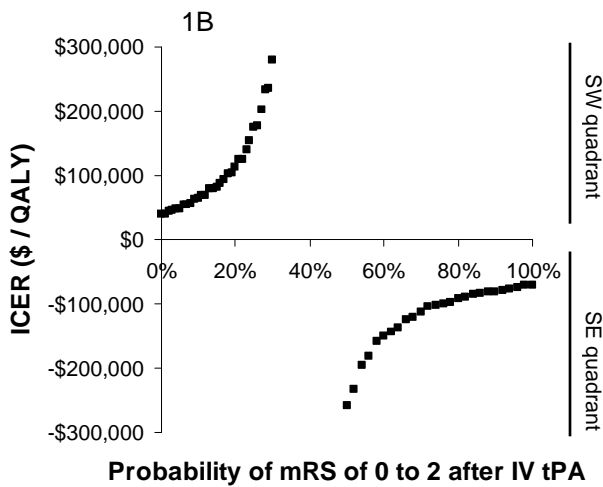

Figure e-2: Probability of symptom improvement at 1 hour after IV tPA. The ICER is  $[(\$_{\text{Multi-modal CT}} - \$_{\text{NCCT}}) / (QALY_{\text{Multi-modal CT}} - QALY_{\text{NCCT}})]$ . For probabilities  $\geq 91\%$ , there is an ICER (willingness-to-pay) for multi-modal CT compared to NCCT, where multi-modal CT has greater costs but also more QALYs.

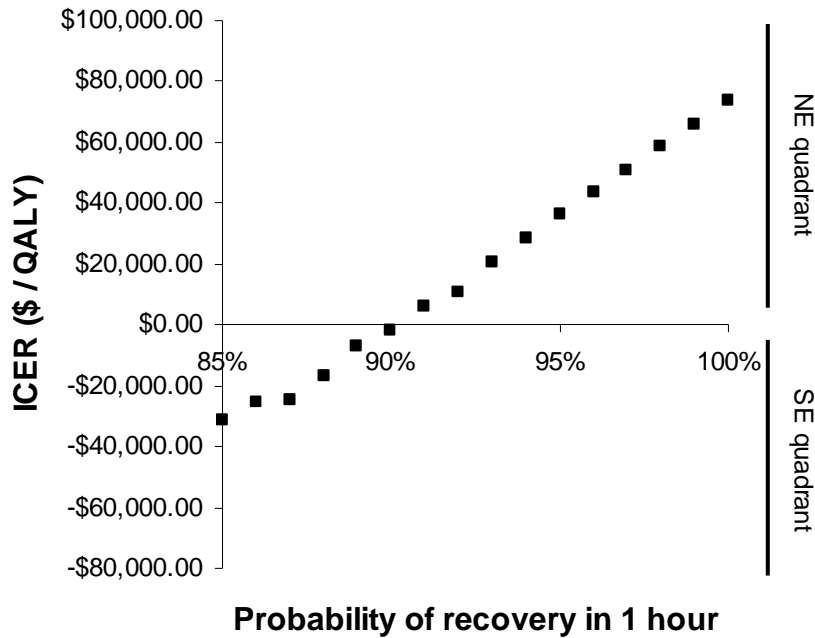

Figure e-3: Relative risk of a mRS of 0 to 2 to test improvements in outcomes with CTP data. All graphs are over the lifetime of the cohort. This cohort has a prevalence of clot of 78%.

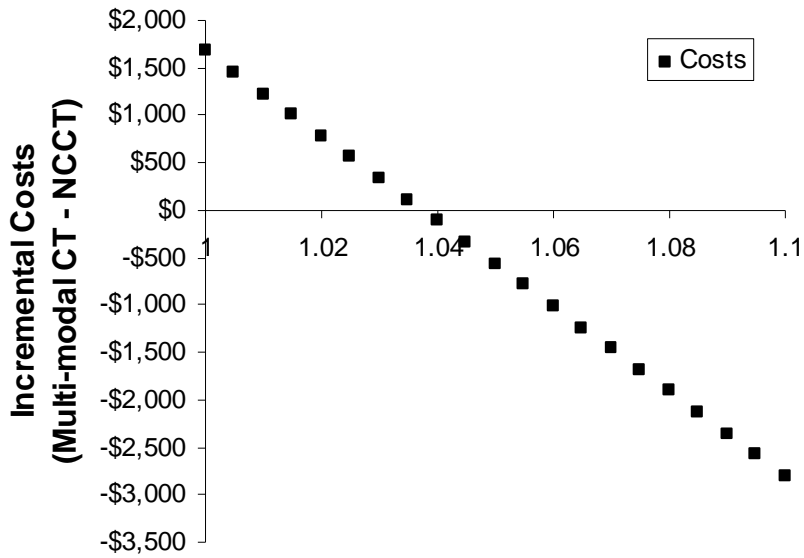

**Relative risk of mRS of 0 to 2 after CTP guided procedures (prevalence of clot=78%)**

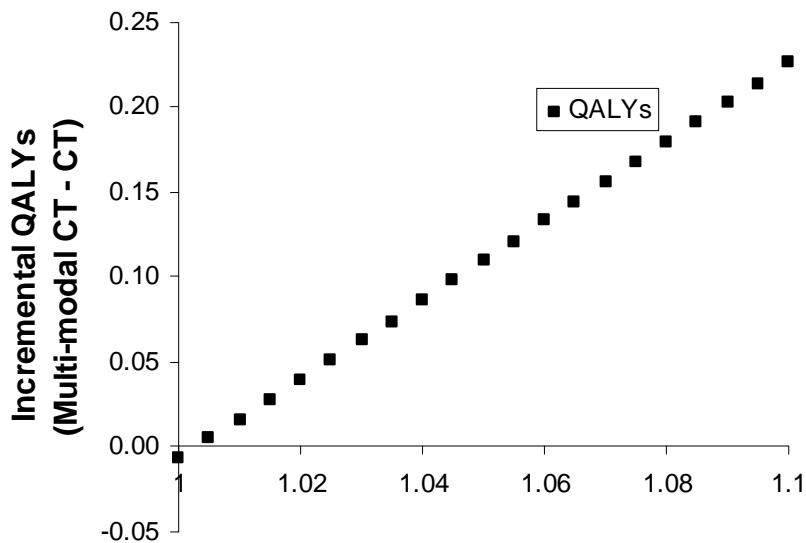

**Relative risk of mRS of 0 to 2 after CTP guided procedures (prevalence of clot=78%)**
